# Supplementary material for: Spatio-Temporal Characteristics and Differences in Snow Density between the Tibet Plateau and the Arctic
Source: MDPI journal article supplement (doi:10.3390/rs15163976), 2023-08-10
Supplement: s1 [file s1]

### Supplementary Materials:

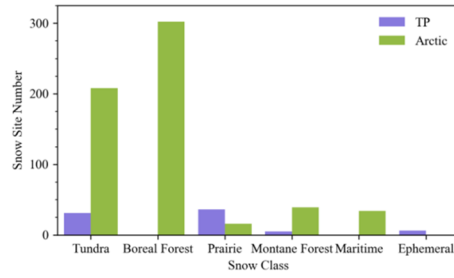

**Figure S1.** Snow site number for snow classes

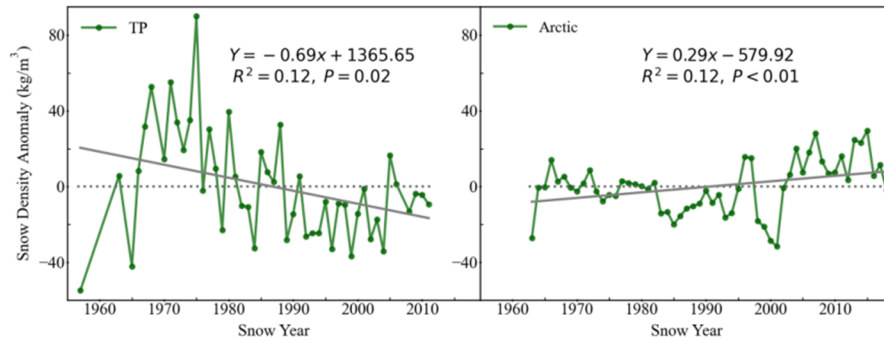

**Figure S2.** Time series of average snow density

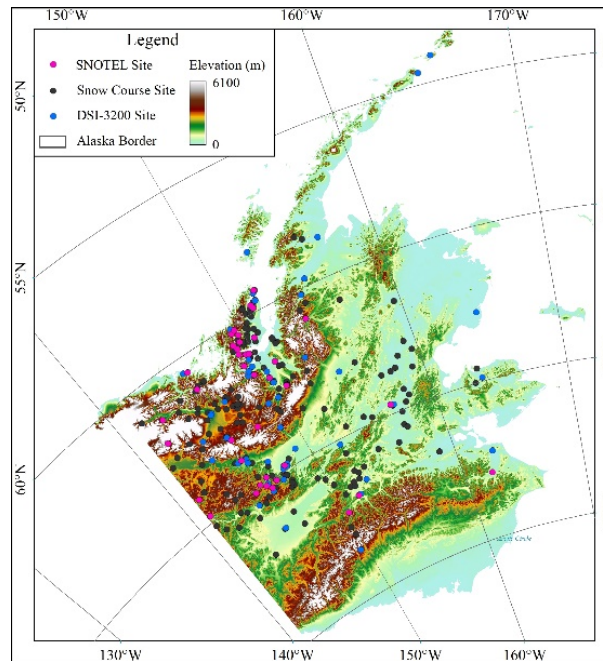

**Figure S3.** Geographical location of snow sites with elevation as background in Alaska

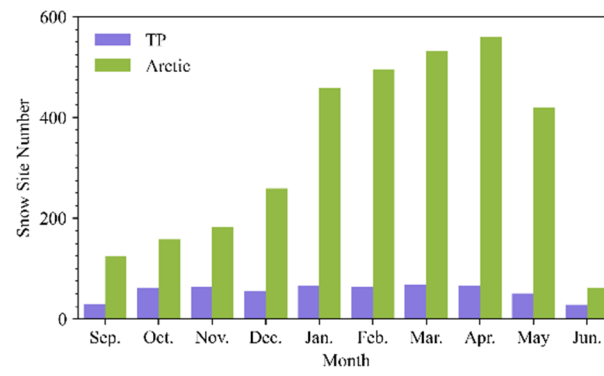

**Figure S4.** Snow site number of per month

**Table S1:** Monthly mean snow densities with one standard deviation of each snow class over the TP and the Arctic. (kg/m<sup>3</sup>)

| Month  | Area   | Tundra | Boreal Forest | Prairie | Montane Forest | Maritime | Ephemeral |
|--------|--------|--------|---------------|---------|----------------|----------|-----------|
| Sep.   | TP     | 129±49 | —             | 143±48  | —              | —        | —         |
|        | Arctic | 234±84 | 233±83        | —       | 257±96         | 327±97   | —         |
| Oct.   | TP     | 132±32 | —             | 109±22  | —              | —        | —         |
|        | Arctic | 190±75 | 152±61        | 152±27  | 175±34         | 214±66   | —         |
| Nov.   | TP     | 141±50 | —             | 113±40  | —              | —        | —         |
|        | Arctic | 201±64 | 148±40        | 175±52  | 177±64         | 185±70   | —         |
| Dec.   | TP     | 153±69 | —             | 128±36  | —              | —        | —         |
|        | Arctic | 212±56 | 172±32        | 194±44  | 199±37         | 244±26   | —         |
| Jan.   | TP     | 144±38 | —             | 113±29  | —              | —        | 96±11     |
|        | Arctic | 218±61 | 182±36        | 195±49  | 214±44         | 277±34   | —         |
| Feb.   | TP     | 143±32 | —             | 124±49  | —              | —        | —         |
|        | Arctic | 227±60 | 193±42        | 211±46  | 224±47         | 289±32   | —         |
| Mar.   | TP     | 141±47 | —             | 112±42  | —              | —        | —         |
|        | Arctic | 234±55 | 204±35        | 214±78  | 243±51         | 312±27   | —         |
| Apr.   | TP     | 136±39 | —             | 134±66  | —              | —        | —         |
|        | Arctic | 258±58 | 241±47        | 263±61  | 294±58         | 357±26   | —         |
| May.   | TP     | 138±47 | —             | 135±43  | —              | —        | —         |
|        | Arctic | 286±72 | 277±68        | 291±45  | 290±54         | 365±66   | —         |
| Jun.   | TP     | 147±49 | —             | 177±55  | —              | —        | —         |
|        | Arctic | 348±57 | 366±95        | —       | —              | 415±56   | —         |
| Annual | TP     | 140±33 | —             | 130±41  | —              | —        | 96±11     |
|        | Arctic | 228±56 | 210±42        | 215±51  | 232±52         | 290±63   | —         |

**Table S2:** Monthly mean snow densities with standard deviation over the TP and the Arctic. (kg/m<sup>3</sup>)

| Area   | Sep.   | Oct.   | Nov.   | Dec.   | Jan.   | Feb.   | Mar.   | Apr.   | May.   | Jun.   | Annual |
|--------|--------|--------|--------|--------|--------|--------|--------|--------|--------|--------|--------|
| TP     | 133±48 | 122±29 | 132±72 | 139±56 | 125±37 | 134±42 | 126±46 | 137±58 | 137±45 | 158±52 | 138±61 |
| Arctic | 244±88 | 177±68 | 183±63 | 200±51 | 206±55 | 215±57 | 225±53 | 257±59 | 289±72 | 346±85 | 223±54 |
